# Supplementary material
Source: MDPI journal article supplement (https://www.mdpi.com/2073-445X/13/5/564)
Supplement: s1 [file s1]

## Supplementary

|          | TITLE                                                                        | Page number |
|----------|------------------------------------------------------------------------------|-------------|
| Tables   |                                                                              |             |
| Table S1 | Demographic characteristics of the sample                                    | 1           |
| Table S2 | Reliability test                                                             | 4           |
| Table S3 | Validity test                                                                | 4           |
| Table S4 | Paired sample T-test of importance and satisfaction of Haizhu Lake Park      | 4           |
| Table S5 | Paired sample T-test of importance and satisfaction in Zhujiang Park         | 5           |
| Table S6 | Paired sample T-test of importance and satisfaction of Yunxi Ecological Park | 6           |

**Table S1.** Demographic characteristics of the sample.

| Attribute         | Features                                                           | Haizhu Lake Park  |                 | Zhujiang Park     |                 | Yunxi Ecological Park |                 | Total             |                 |
|-------------------|--------------------------------------------------------------------|-------------------|-----------------|-------------------|-----------------|-----------------------|-----------------|-------------------|-----------------|
|                   |                                                                    | Num-ber of people | propor-tion (%) | Num-ber of people | propor-tion (%) | Num-ber of people     | propor-tion (%) | Num-ber of people | propor-tion (%) |
| Gender            | Man                                                                | 112               | 53.6            | 95                | 50.5            | 76                    | 52.4            | 283               | 52.2            |
|                   | Women                                                              | 97                | 46.4            | 93                | 49.5            | 69                    | 47.6            | 259               | 47.8            |
| Profession        | Staff of Party and government organs, enterprises and institutions | 11                | 5.3             | 12                | 6.4             | 11                    | 7.6             | 34                | 6.3%            |
|                   | Professional technical personnel                                   | 23                | 11.0            | 27                | 14.4            | 8                     | 5.5             | 58                | 10.7%           |
|                   | Business, Service industry                                         | 30                | 14.4            | 29                | 15.4            | 20                    | 13.8            | 79                | 14.6%           |
|                   | Soldier                                                            | 0                 | 0               | 4                 | 2.1             | 1                     | 0.7             | 5                 | 0.9%            |
|                   | Worker                                                             | 14                | 6.7             | 1                 | 0.5             | 4                     | 2.8             | 19                | 3.5%            |
|                   | Student                                                            | 32                | 15.3            | 17                | 9.0             | 13                    | 9.0             | 62                | 11.4%           |
|                   | Peasant                                                            | 2                 | 1.0             | 4                 | 2.1             | 0                     | 0               | 6                 | 1.1%            |
|                   | Freelancer                                                         | 53                | 25.4            | 46                | 24.5            | 24                    | 16.6            | 123               | 22.7%           |
|                   | inoccupation                                                       | 4                 | 1.9             | 7                 | 3.7             | 9                     | 6.2             | 20                | 3.7%            |
|                   | Retirement                                                         | 16                | 7.7             | 12                | 6.4             | 44                    | 30.3            | 72                | 13.3%           |
|                   | Other                                                              | 24                | 11.5            | 29                | 15.4            | 11                    | 7.6             | 64                | 11.8%           |
| Educational level | Junior high school and below                                       | 53                | 25.4            | 17                | 9.0             | 24                    | 16.6            | 94                | 17.3            |
|                   | high school                                                        | 56                | 26.8            | 32                | 17.0            | 37                    | 25.5            | 125               | 23.1            |
|                   | Technical secondary and junior college                             | 38                | 18.2            | 54                | 28.7            | 47                    | 32.4            | 139               | 25.6            |
|                   | Undergraduate course                                               | 50                | 23.9            | 69                | 36.7            | 34                    | 23.4            | 153               | 28.2            |
|                   | Postgraduate and above                                             | 12                | 5.7             | 16                | 8.5             | 3                     | 2.1             | 31                | 5.7             |
| The fre-          | 3-4 times a                                                        | 49                | 23.4            | 72                | 38.3            | 67                    | 46.2            | 188               | 34.7            |

|                                                         |                                     |     |      |     |      |     |      |     |      |
|---------------------------------------------------------|-------------------------------------|-----|------|-----|------|-----|------|-----|------|
| quency of<br>park visita-<br>tions                      | week                                |     |      |     |      |     |      |     |      |
|                                                         | 1-2 times a<br>week                 | 50  | 23.9 | 65  | 34.6 | 34  | 23.4 | 149 | 27.5 |
|                                                         | Once or twice<br>a month            | 63  | 30.1 | 30  | 16.0 | 29  | 20.0 | 122 | 22.5 |
|                                                         | Every few<br>months or less         | 47  | 22.5 | 21  | 11.2 | 15  | 10.3 | 83  | 15.3 |
| The dura-<br>tion of park<br>visitation                 | Within 2 hours                      | 105 | 50.2 | 115 | 61.2 | 47  | 32.4 | 267 | 49.3 |
|                                                         | 2-4 hours                           | 94  | 45.0 | 72  | 38.3 | 83  | 57.2 | 249 | 45.9 |
|                                                         | 4-8 hours                           | 10  | 4.8  | 1   | 0.5  | 12  | 8.3  | 23  | 4.2  |
|                                                         | More than 8<br>hours                | 0   | 0    | 0   | 0    | 3   | 2.1  | 3   | 0.6  |
| The dura-<br>tion of your<br>stay in<br>Guang-<br>zhou. | tourist                             | 28  | 13.4 | 8   | 4.3  | 6   | 4.1  | 42  | 7.7  |
|                                                         | New citizen                         | 10  | 4.8  | 7   | 3.7  | 2   | 1.4  | 19  | 3.6  |
|                                                         | Senior citizen                      | 171 | 81.8 | 173 | 92.0 | 137 | 94.5 | 481 | 88.7 |
| Annual<br>household<br>income                           | Less than<br>60,000 yuan            | 38  | 21.1 | 32  | 19.4 | 30  | 27.8 | 100 | 22.1 |
|                                                         | 60,000 to<br>100,000 yuan           | 71  | 39.4 | 29  | 17.6 | 24  | 22.2 | 124 | 27.4 |
|                                                         | 100,000 to<br>140,000 yuan          | 33  | 18.3 | 28  | 17.0 | 18  | 16.7 | 79  | 17.4 |
|                                                         | 140,000 to<br>190,000 yuan          | 17  | 9.4  | 18  | 10.9 | 11  | 10.2 | 46  | 10.2 |
|                                                         | 190,000 to<br>300,000 yuan          | 13  | 7.2  | 24  | 14.5 | 11  | 10.2 | 48  | 10.6 |
|                                                         | More than<br>300,000 yuan           | 8   | 4.4  | 34  | 20.6 | 14  | 13.0 | 56  | 12.4 |
| Age                                                     | Youth 16-29                         | 102 | 49.5 | 60  | 32.3 | 30  | 20.7 | 192 | 35.7 |
|                                                         | Middle age 30-<br>49                | 81  | 39.3 | 109 | 58.6 | 57  | 39.3 | 247 | 46.0 |
|                                                         | Middle-aged<br>and elderly<br>50-65 | 21  | 10.2 | 14  | 7.5  | 47  | 32.4 | 82  | 15.3 |
|                                                         | Aged 65 years<br>or older           | 2   | 1.0  | 3   | 1.6  | 11  | 7.6  | 16  | 3.0  |

**Table S2.** Reliability test.

| Index       | Haizhu Lake Park |    | Zhujiang Park    |    | Yunxi Ecological Park |    |
|-------------|------------------|----|------------------|----|-----------------------|----|
|             | Cronbach's Alpha | 项数 | Cronbach's Alpha | 项数 | Cronbach's Alpha      | 项数 |
| Importance  | 0.890            | 19 | 0.892            | 19 | 0.894                 | 19 |
| Performance | 0.875            | 19 | 0.894            | 19 | 0.865                 | 19 |

**Table S3.** Validity test.

| KMO and Bartlett tests             |                               | Haizhu Lake Park |             | Zhujiang Park |             | Yunxi Ecological Park |             |
|------------------------------------|-------------------------------|------------------|-------------|---------------|-------------|-----------------------|-------------|
|                                    |                               | Importance       | Performance | Importance    | Performance | Importance            | Performance |
| KMO sample appropriateness measure |                               | 0.906            | 0.883       | 0.913         | 0.885       | 0.907                 | 0.886       |
| Bartlett sphericity test           | Approximate Chi-squared value | 1951.948         | 1591.611    | 1769.167      | 1641.726    | 1594.278              | 1397.277    |
|                                    | Degree of freedom             | 171              | 171         | 171           | 171         | 171                   | 171         |
|                                    | significance                  | 0.000            | 0.000       | 0.000         | 0.000       | 0.000                 | 0.000       |

**Table S4.** Paired sample T-test of importance and satisfaction of Haizhu Lake Park.

| Landscape service type | Landscape Service Index | Importance (I) |                    | Satisfaction (S) |                    | Difference of means (S-I) | T value | P value |
|------------------------|-------------------------|----------------|--------------------|------------------|--------------------|---------------------------|---------|---------|
|                        |                         | Mean value     | Standard deviation | Mean value       | Standard deviation |                           |         |         |
| Supplying services     | Food production         | 2.69           | 1.157              | 2.77             | 1.334              | 0.08                      | -0.887  | 0.376   |
|                        | Raw material supply     | 3.62           | 0.929              | 3.87             | 1.397              | 0.25                      | -3.051  | 0.003   |
| Adjusting service      | Air purification        | 4.23           | 0.669              | 4.75             | 0.780              | 0.52                      | -9.960  | 0.000   |
|                        | Microclimate regulation | 4.15           | 0.645              | 4.73             | 0.707              | 0.58                      | -11.151 | 0.000   |
|                        | Rainwater storage       | 3.94           | 0.830              | 4.34             | 1.118              | 0.40                      | -5.729  | 0.000   |
|                        | Waste disposal          | 3.72           | 0.935              | 3.88             | 1.397              | 0.16                      | -2.264  | 0.025   |
|                        | Disaster adjustment     | 3.72           | 0.977              | 4.02             | 1.349              | 0.30                      | -3.990  | 0.000   |
|                        | Noise mitigation        | 4.14           | 0.657              | 4.62             | 0.768              | 0.48                      | -8.878  | 0.000   |
| Habitat Services       | biodiversity            | 3.86           | 0.885              | 4.42             | 0.902              | 0.56                      | -8.629  | 0.000   |
|                        | nutrient cycling        | 4.03           | 0.749              | 4.55             | 0.900              | 0.52                      | -9.202  | 0.000   |
| Cultural Services      | Inspiration             | 4.07           | 0.775              | 4.66             | 0.810              | 0.59                      | -10.801 | 0.000   |
|                        | Educational value       | 3.60           | 0.986              | 3.90             | 1.353              | 0.30                      | -3.599  | 0.000   |
|                        | Recreation and          | 4.00           | 0.806              | 4.49             | 0.941              | 0.49                      | -7.887  | 0.000   |

|  |                            |      |       |      |       |       |         |       |
|--|----------------------------|------|-------|------|-------|-------|---------|-------|
|  | entertainment              |      |       |      |       |       |         |       |
|  | Physical and mental health | 4.23 | 0.685 | 4.79 | 0.581 | 0.56  | -12.402 | 0.000 |
|  | Cultural preservation      | 3.33 | 1.098 | 3.41 | 1.463 | 0.08  | -1.616  | 0.108 |
|  | spiritual value            | 2.23 | 1.104 | 2.50 | 1.342 | 0.27  | -3.986  | 0.000 |
|  | Social interaction         | 3.77 | 0.858 | 4.47 | 1.032 | 0.70  | -12.072 | 0.000 |
|  | Sense of belonging         | 3.68 | 0.866 | 4.13 | 1.133 | 0.45  | -6.955  | 0.000 |
|  | Safety                     | 4.32 | 0.685 | 4.22 | 1.160 | -0.10 | -6.001  | 0.000 |

**Table S5.** Paired sample T-test of importance and satisfaction in Zhujiang Park.

| Landscape service type | Landscape Service Index      | Importance (I) |                    | Satisfaction (S) |                    | Difference of means (S-I) | T value | P value |
|------------------------|------------------------------|----------------|--------------------|------------------|--------------------|---------------------------|---------|---------|
|                        |                              | Mean value     | Standard deviation | Mean value       | Standard deviation |                           |         |         |
| Supplying services     | Food production              | 2.60           | 1.204              | 2.80             | 1.261              | 0.20                      | -2.495  | 0.013   |
|                        | Raw material supply          | 3.57           | 1.013              | 3.72             | 1.388              | 0.15                      | -2.188  | 0.030   |
| Adjusting service      | Air purification             | 4.33           | 0.583              | 4.73             | 0.646              | 0.40                      | -9.663  | 0.000   |
|                        | Microclimate regulation      | 4.25           | 0.634              | 4.81             | 0.397              | 0.56                      | -15.021 | 0.000   |
|                        | Rainwater storage            | 3.93           | 0.862              | 4.29             | 1.127              | 0.36                      | -6.840  | 0.000   |
|                        | Waste disposal               | 3.76           | 1.045              | 3.94             | 1.292              | 0.18                      | -3.627  | 0.000   |
|                        | Disaster adjustment          | 3.88           | 0.914              | 4.14             | 1.258              | 0.26                      | -5.271  | 0.000   |
|                        | Noise mitigation             | 4.21           | 0.692              | 4.73             | 0.546              | 0.52                      | -11.425 | 0.000   |
| Habitat Services       | biodiversity                 | 4.01           | 0.834              | 4.50             | 0.847              | 0.49                      | -8.065  | 0.000   |
|                        | nutrient cycling             | 4.20           | 0.703              | 4.65             | 0.818              | 0.45                      | -7.930  | 0.000   |
| Cultural Services      | Inspiration                  | 4.22           | 0.632              | 4.72             | 0.625              | 0.50                      | -11.637 | 0.000   |
|                        | Educational value            | 3.67           | 0.947              | 4.20             | 1.017              | 0.53                      | -8.237  | 0.000   |
|                        | Recreation and entertainment | 4.27           | 0.649              | 4.65             | 0.827              | 0.38                      | -8.499  | 0.000   |
|                        | Physical and mental health   | 4.31           | 0.603              | 4.86             | 0.466              | 0.55                      | -16.945 | 0.000   |
|                        | Cultural preservation        | 3.17           | 1.086              | 3.19             | 1.432              | 0.02                      | -0.843  | 0.401   |
|                        | spiritual value              | 2.08           | 1.132              | 2.42             | 1.219              | 0.34                      | -4.682  | 0.000   |
|                        | Social interaction           | 3.93           | 0.798              | 4.55             | 0.864              | 0.62                      | -11.300 | 0.000   |

|  |                    |      |       |      |       |      |         |       |
|--|--------------------|------|-------|------|-------|------|---------|-------|
|  | Sense of belonging | 3.94 | 0.775 | 4.51 | 0.831 | 0.57 | -13.046 | 0.000 |
|  | Safety             | 4.38 | 0.656 | 4.71 | 0.603 | 0.33 | -7.349  | 0.000 |

**Table S6.** Paired sample T-test of importance and satisfaction of Yunxi Ecological Park.

| Landscape service type | Landscape Service Index      | Importance (I) |                    | Satisfaction (S) |                    | Difference of means (S-I) | T value | P value |
|------------------------|------------------------------|----------------|--------------------|------------------|--------------------|---------------------------|---------|---------|
|                        |                              | Mean value     | Standard deviation | Mean value       | Standard deviation |                           |         |         |
| Supplying services     | Food production              | 2.90           | 1.282              | 2.84             | 1.301              | -0.06                     | -0.422  | 0.673   |
|                        | Raw material supply          | 3.67           | 1.061              | 3.61             | 1.534              | -0.06                     | -0.711  | 0.478   |
| Adjusting service      | Air purification             | 4.39           | 0.616              | 4.80             | 0.401              | 0.41                      | -10.843 | 0.000   |
|                        | Microclimate regulation      | 4.30           | 0.625              | 4.85             | 0.362              | 0.55                      | -13.871 | 0.000   |
|                        | Rainwater storage            | 3.99           | 0.862              | 4.29             | 1.194              | 0.30                      | -6.840  | 0.000   |
|                        | Waste disposal               | 3.92           | 0.983              | 4.06             | 1.398              | 0.14                      | -2.193  | 0.030   |
|                        | Disaster adjustment          | 3.87           | 0.922              | 4.06             | 1.404              | 0.19                      | -3.236  | 0.002   |
|                        | Noise mitigation             | 4.28           | 0.661              | 4.81             | 0.456              | 0.53                      | -11.245 | 0.000   |
| Habitat Services       | biodiversity                 | 4.10           | 0.797              | 4.66             | 0.699              | 0.56                      | -10.267 | 0.000   |
|                        | nutrient cycling             | 4.25           | 0.732              | 4.54             | 1.001              | 0.29                      | -5.532  | 0.000   |
| Cultural Services      | Inspiration                  | 4.14           | 0.697              | 4.78             | 0.440              | 0.64                      | -15.911 | 0.000   |
|                        | Educational value            | 3.65           | 1.024              | 3.90             | 1.192              | 0.25                      | -3.396  | 0.001   |
|                        | Recreation and entertainment | 4.15           | 0.691              | 4.67             | 0.585              | 0.52                      | -9.350  | 0.000   |
|                        | Physical and mental health   | 4.33           | 0.667              | 4.78             | 0.551              | 0.45                      | -9.255  | 0.000   |
|                        | Cultural preservation        | 3.21           | 1.209              | 2.84             | 1.509              | -0.37                     | 1.435   | 0.154   |
|                        | spiritual value              | 2.23           | 1.206              | 2.27             | 1.246              | 0.04                      | -1.992  | 0.048   |
|                        | Social interaction           | 4.05           | 0.776              | 4.71             | 0.560              | 0.66                      | -10.945 | 0.000   |
|                        | Sense of belonging           | 4.08           | 0.826              | 4.62             | 0.654              | 0.54                      | -10.265 | 0.000   |
|                        | Safety                       | 4.48           | 0.636              | 4.83             | 0.379              | 0.35                      | -9.513  | 0.000   |
